# Supplementary material for: MANET 3.0: Hierarchy and modularity in evolving metabolic networks
Source: PLoS One. 2019 Oct 24;14(10):e0224201. doi: 10.1371/journal.pone.0224201 (PMC6812854; doi:10.1371/journal.pone.0224201)
Supplement: S5 Table — alpha: exponent for the fitted power law distribution, xmin: lower bound for the power law fitting, logLik: log-likelihood of fitted parameters, KS.stat: test statistic for the Kolmogorov Smirnov test between fitted and sample distribution and KS.p: p-value for the Kolmogorov Smirnov test between fitted and sample distribution. (XLSX) [file pone.0224201.s019.xlsx]

## Sheet: Sheet1
Network	nd Value	alpha	xmin	logLik	KS.stat	KS.p
Bipartite	0.1	2.06138	1	-1164.59	0.0317291	0.429414
	0.2	2.10203	1	-1461.98	0.017831	0.910076
	0.3	2.13933	1	-1695.62	0.0165754	0.897343
	0.4	2.15905	1	-1812.79	0.0202976	0.655413
	0.5	2.16338	1	-1882.52	0.0204175	0.621721
	0.6	2.1751	1	-1919.78	0.0191076	0.684525
	0.7	2.19694	1	-2252.84	0.0204483	0.482367
	0.8	2.20894	1	-2401.53	0.0216743	0.361261
	0.9	2.21644	1	-2573.43	0.0218643	0.306212
	1	2.22259	1	-2707.19	0.0227664	0.232853
Subnetwork 1-mode	0.1	2	1	-3792.17	0.7558	0
	0.2	2	1	-5695.73	0.798754	0
	0.3	2	1	-7324.9	0.825959	0
	0.4	2	1	-8202.74	0.82986	0
	0.5	2	1	-8712.14	0.833223	0
	0.6	2	1	-9059.69	0.835626	0
	0.7	2	1	-11229.2	0.83827	0
	0.8	2	1	-12405.2	0.851467	0
	0.9	2	1	-13755.8	0.864336	0
	1	2	1	-14726.7	0.871691	0
Enzyme 1-mode	0.1	1.39459	1	-412.294	0.277736	2e-07
	0.2	1.38562	1	-444.659	0.289158	0
	0.3	1.39333	1	-465.081	0.270956	1e-07
	0.4	1.38947	1	-480.995	0.283645	0
	0.5	1.38119	1	-493.997	0.294935	0
	0.6	1.38007	1	-495.264	0.30166	0
	0.7	1.37582	1	-525.526	0.301159	0
	0.8	1.36833	1	-542.684	0.306808	0
	0.9	1.36626	1	-553.972	0.300009	0
	1	1.36444	1	-565.119	0.31608	0
